# Supplementary material for: Topochemical synthesis and photocatalytic activity of 3D hierarchical BaTiO3 microspheres constructed from crystal-axis-oriented nanosheets
Source: Royal Society of Chemistry journal article supplement (doi:10.1039/c7dt00724h), 2017-01-01
Supplement: c7dt00724h1.pdf [file c7dt00724h1.pdf]

## Support Information

### Topochemical synthesis and Photocatalytic Activity of 3D Hierarchical BaTiO<sub>3</sub>

#### Microspheres Constructed from Crystal-Axis-Oriented Nanosheets

Chang-Ke Chen<sup>a,b</sup>, Shi-Xi Zhao<sup>\*a</sup>, Qian-Long Lu<sup>a,b</sup>, Kai Luo<sup>a,b</sup>, Xi-Hui Zhang<sup>a</sup> and Ce-Wen Nan<sup>b</sup>

<sup>a</sup>Graduate School at Shenzhen, Tsinghua University, Shenzhen, 518055, China

<sup>b</sup>School of Materials Science and Engineering, Tsinghua University, Beijing 100084, China

\*Corresponding Author: Tel: +86 0755 26036372; Fax: +86 0755 26036372;

E-mail: zhaosx@sz.tsinghua.edu.cn;

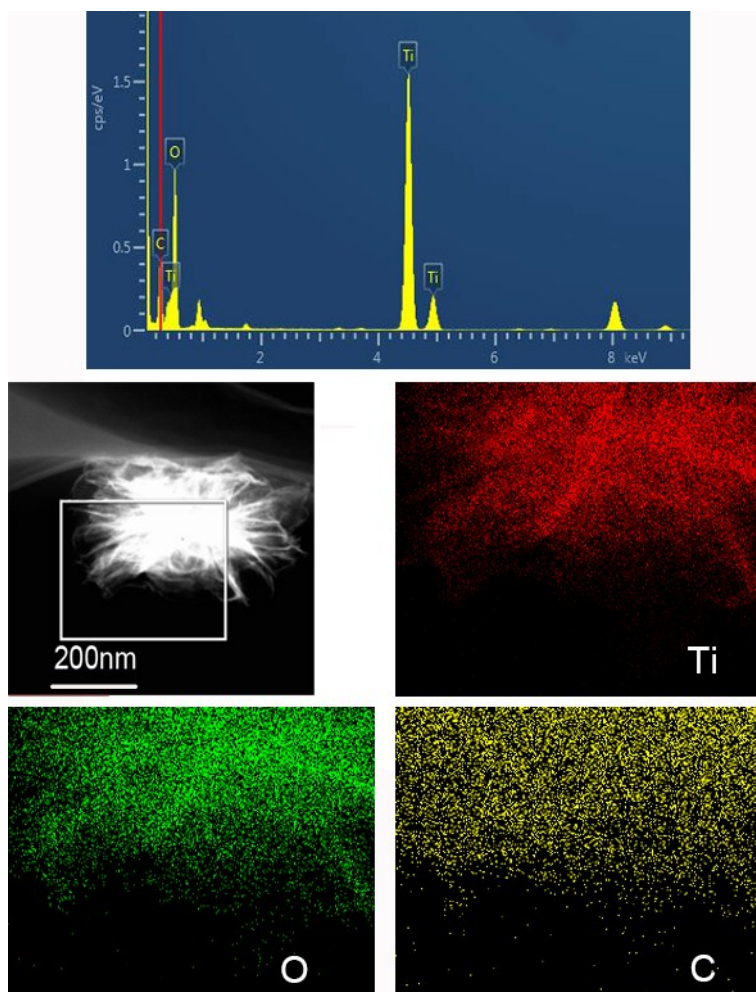

Fig.S1) the HTO hierarchical microspheres by EDX analysis

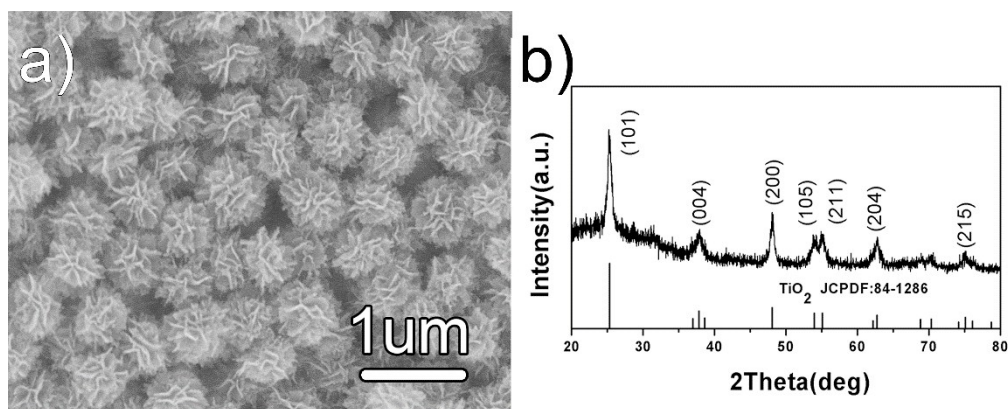

Fig.S2 a ) TEM image, and b) XRD patten of rutile  $\text{TiO}_2$  replicas were obtained through calcination of the HTO microspheres in air at  $450^\circ\text{C}$  for 3 h.

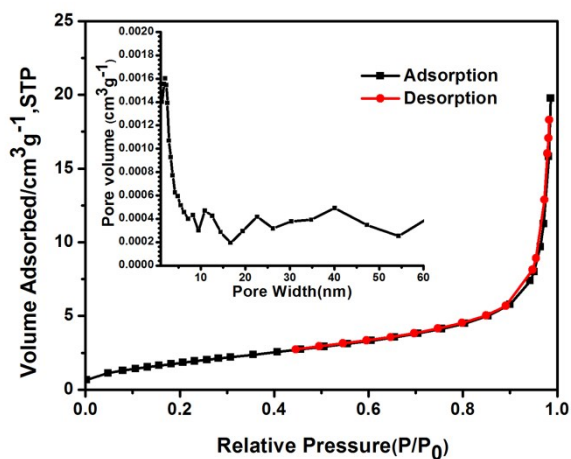

Fig.S3  $\text{N}_2$  adsorption–desorption isotherms of HTO precursor and the corresponding pore-size distribution (inset) .

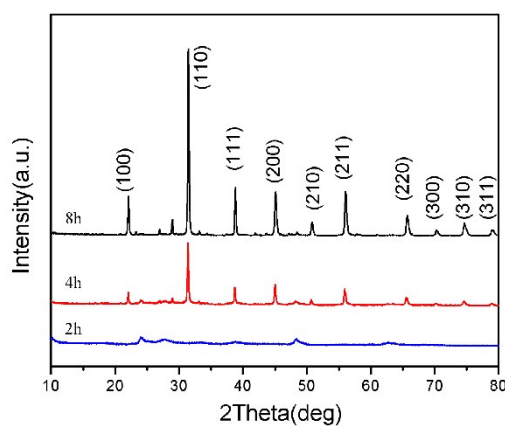

Fig.S4 XRD of the  $\text{BaTiO}_3$  products obtained at  $160^\circ\text{C}$  for different reaction time from 2, 4, to 8 h.

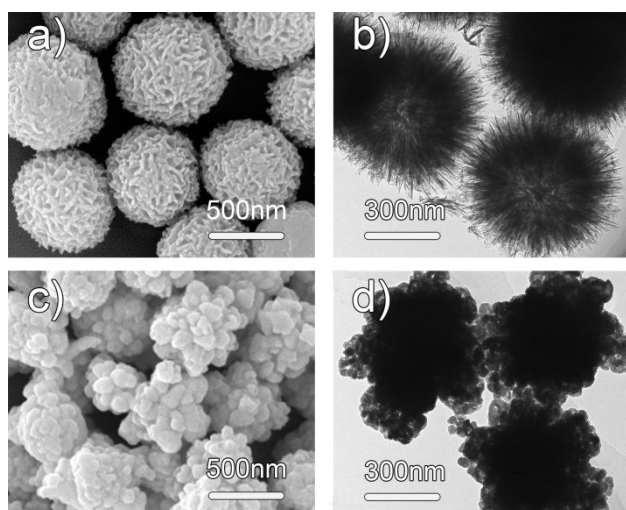

Figure.S5 a ) SEM image, and b) TEM image of the BaTiO<sub>3</sub> nanostructure obtained at 160 °C for 24 h. c ) SEM image, and d) TEM image of the BT-200 obtained at 200 °C for 12 h.

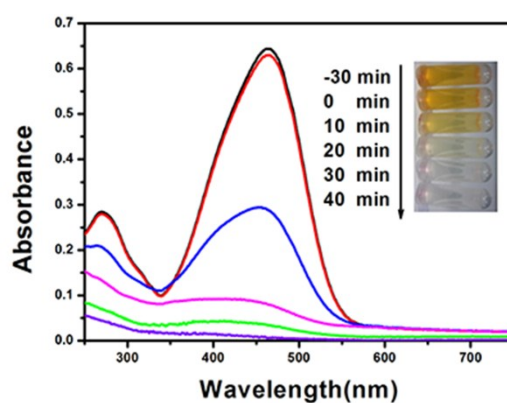

Fig.S6 Absorption spectra and photographs (see the inset) of MO aqueous solution.

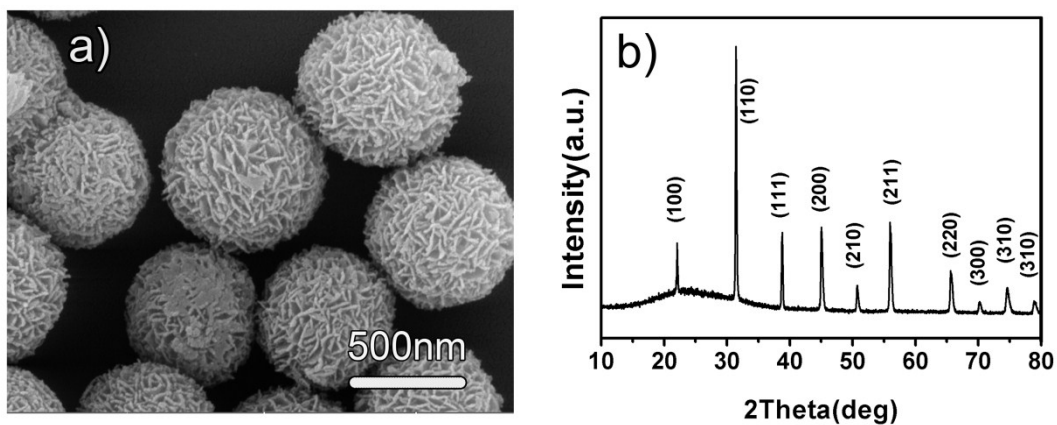

Fig.S7 a) TEM image, and b) XRD patten of BT-160 hierarchical microspheres after photodegradation of MO with 5 cycles.
